***In silico* design and validation of commercial kit GPS™ CoVID-19 dtec-RT-qPCR Test under criteria of UNE/EN ISO 17025:2005 and ISO/IEC 15189:2012**

Antonio Martínez-Murcia<sup>1,2</sup>, Gema Bru<sup>2</sup>, Aaron Navarro<sup>2</sup>, Patricia Ros-Tárraga<sup>2</sup>, Adrián García-Sirera<sup>2</sup>, Laura Pérez<sup>2</sup>

<sup>1</sup>Department of Microbiology, University Miguel Hernández, 03300-Orihuela, Alicante, Spain

<sup>2</sup>Genetic PCR Solutions™, 03206-Elche, Alicante, Spain

**Running title:** Validation of qPCR kit for detection of SARS-CoV-2

**Keywords:** SARS-CoV-2, qPCR, detection, validation, UNE/EN ISO/IEC 17025:2005

**\*Corresponding author:**

Dr Antonio J. Martínez-Murcia

Department of Microbiology,

University Miguel Hernández,

03300-Orihuela, Alicante, Spain

Phone: +34-965429901

Fax: +34-966661040

Electronic address: ammurcia@umh.es

**ABSTRACT**

**Background**

The Corona Virus Disease 2019 (COVID-19), caused by Severe Acute Respiratory Syndrome Coronavirus 2 (SARS-CoV-2), has become a serious infectious disease affecting human health worldwide and rapidly declared a pandemic by WHO. Early, several RT-qPCR were designed by using only the first SARS-CoV-2 genome sequence.

**Objectives**

A few days later, when additional SARS-CoV-2 genome were retrieved, the kit GPS™ CoVID-19 dtec-RT-qPCR Test was designed to provide a highly specific detection method and commercially available worldwide. The kit was validated following criteria recommended by the UNE/EN ISO 17025:2005 and ISO/IEC 15189:2012.

**Methods**

The present study approached the *in silico* specificity of the GPS™ CoVID-19 dtec-RT-qPCR Test and RT-qPCR designs currently published. The empirical validation parameters specificity (inclusivity/exclusivity), quantitative phase analysis (10-10<sup>6</sup> copies), reliability (repeatability/reproducibility) and sensitivity (detection/quantification limits) were evaluated for a minimum of 10-15 assays. Diagnostic validation was achieved by two independent reference laboratories, the Instituto de Salud Carlos III (ISCIII), (Madrid, Spain) and the Public Health England (PHE; Colindale, London, UK).

**Results**

The GPS™ RT-qPCR primers and probe showed the highest number of mismatches with the closet related non-SARS-CoV-2 coronavirus, including some indels. The kits passed all parameters of validation with strict acceptance criteria. Results from reference laboratories 100% correlated with these obtained by suing reference methods and received an evaluation with 100% of diagnostic sensitivity and specificity.

**Conclusions**

The GPS™ CoVID-19 dtec-RT-qPCR Test, available with full analytical and diagnostic validation, represents a case of efficient transfer of technology being successfully used since the pandemic was declared. The analysis suggested the GPS™ CoVID-19 dtec-RT-qPCR Test is the more exclusive by far.

58        **1. INTRODUCTION**

59        Last 30<sup>th</sup> January, the Emergency Committee of the World Health Organization (WHO) under the  
60        International Health Regulations (IHR) declared an outbreak of pneumonia, lately named Corona  
61        Virus Disease 2019 (COVID-19), as a "Public Health Emergency of International Concern"  
62        (PHEIC). The disease is caused by Severe Acute Respiratory Syndrome Coronavirus 2 (SARS-  
63        CoV-2) and the first genome was rapidly provided ([http://virological.org/t/novel-2019-coronavirus-](http://virological.org/t/novel-2019-coronavirus-genome/319)  
64        [genome/319](http://virological.org/t/novel-2019-coronavirus-genome/319)). SARS-CoV-2 is a Betacoronavirus subgenus *Sarbecovirus* of group 2B and, in  
65        many ways, it resembles SARS-CoV, Bat-SARS-CoV and other Bat SARS-like-CoV [1-6] A few  
66        weeks later, this novel coronavirus spread worldwide and forced the WHO to declare a Pandemic  
67        on March 11 when more than 118,000 positives and 4,291 deaths were already registered in 114  
68        countries. Today, 5<sup>th</sup> May, the number of positive cases globally amounts to more than 3.6 million  
69        people with more than 250,000 deaths. Faced with the aggressiveness of this global alarm, the  
70        massive, reliable, and rapid diagnosis is undoubtedly vital and foremost priority for decision-  
71        making at each stage to facilitate public health interventions, and the needs have overwhelmed  
72        any forecast.

73        Current molecular diagnostic tools for viral detection are typically based upon the amplification of  
74        target-specific genetic sequences using the Polymerase Chain Reaction (PCR). In acute  
75        respiratory infection, real time PCR (so-called quantitative PCR; qPCR) is the gold-standard and  
76        routinely used to detect causative viruses as, by far, is the most sensitive and reliable method [7-  
77        11]. On the 17<sup>th</sup> January, the WHO published the very first primers and probes for Reverse  
78        Transcriptase qPCR (RT-qPCR) developed by Corman et al., 2020 [12]. They used known  
79        genomic data from SARS-CoV and SARS-CoV related (Bat viruses) to generate a non-redundant  
80        alignment. The candidate diagnostic RT-PCR assay was designed upon the first SARS-CoV-2  
81        sequence release, based on the sequence alignment match to known SARS-CoV. Because only  
82        a single SARS-CoV-2 genome was available, the two monoplex PCR protocols (ORF1ab and N  
83        genes) designed to detect SARS-CoV-2 are also reactive to SARS-CoV and Bat SARS-like-CoV.  
84        A few days later, 23<sup>rd</sup> January, the same laboratory together with reference laboratories from the  
85        Netherlands, Hong Kong, France, United Kingdom, and Belgium, added a third monoplex-RT-  
86        qPCR [12]. Many laboratories worldwide are currently using this RT-qPCR protocol [13] and also  
87        it has been the basis to develop many commercial kits. Almost simultaneously, other primers and  
88        probes were designed and available by scientists from the Institut Pasteur, París; Centers for  
89        Disease Control and Prevention (CDC), Division of Viral Diseases, Atlanta, USA; National Institute  
90        for Viral Disease Control and Prevention (CDC), China; Hong Kong University; Department of  
91        Medical Sciences, Ministry of Public Health, Thailand; the National Institute of Infectious Diseases,

Japan [12-19]. The Respiratory Viruses Branch, Division of Viral Diseases, CDC, Atlanta, recently (4<sup>th</sup> February) updated a manual of Real-Time RT-PCR Panel for detection of this 2019-Novel Coronavirus (SARS-CoV-2), which was modified 15<sup>th</sup> March. The SARS-CoV-2 primer and probe sets were designed for the universal detection of SARS-like coronaviruses (N3 assay) and for specific detection of SARS-CoV-2 (N1 and N2 assays). Finally, authors from the Institut Pasteur, Paris, based on the first sequences of SARS-CoV-2 available on the GISAID database (Global Initiative on Sharing All Influenza Data) on 11<sup>th</sup> January, updated a protocol for the detection of SARS-CoV-2 for two RdRp targets (IP2 and IP4) [14].

Some biotechnology-based companies have recently developed kits for detection of SARS-CoV-2, based on RT-qPCR and provided easy transfer of technology to laboratories worldwide. A fully SARS-CoV-2-specific RT-qPCR thermostable kit was early launched on 27<sup>th</sup> January by Genetic PCR Solutions™ (GPS™), a brand of Genetic Analysis Strategies SL. (Alicante, Spain). The alignments used at that time included 13 SARS-CoV-2 genome sequences released by 6 different laboratories, deposited in GISAID and available since 19<sup>th</sup> January 2020. With the purpose to discriminate this new SARS-CoV-2 of present outbreak from previous related SARS, a second independent multiplex RT-qPCR test to detect any other non-SARS-CoV-2 was also produced and provided (not shown). On this study, we have performed a deep analytical and diagnostic validation of the GPS™ COVID-19 dtec-RT-qPCR Test, following the UNE/EN ISO 17025:2005 and ISO/IEC 15189:2012, respectively. A comparative analysis of the specificity (inclusivity and exclusivity) of the designed primers and probes with most previously published RT-qPCR methods is also here reported.

**2. MATERIALS AND METHODS**

**2.1. GENOME SEQUENCES ALIGNMENT AND PHYLOGENETIC ANALYSIS**

Partial alignments of ten SARS-CoV-2 genomic sequences and these from strains of Bat-CoV, Bat SARS-like-CoV, SARS-CoV, Pangolin-CoV (ca. 18,141 bp) and the corresponding phylogenetic tree (Figure 1) was obtained by Neighbour joining method [20], with bootstrap values for 1000 replicates, using the MEGA 5.2.2 software [21].

**2.2. *IN SILICO* COMPARATIVE ANALYSIS OF PRIMERS/PROBES SPECIFICITY**

The primers and probes of GPS™ COVID-19 dtec-RT-qPCR Test and the RT-qPCR designs recently published [12-19] were aligned to the corresponding homologous regions of 63 SARS-CoV-2 strains and closely related Betacoronavirus using the Basic Local Alignment Search Tool (BLAST) software available on the National Center for Biotechnology Information (NCBI, <https://blast.ncbi.nlm.nih.gov/Blast.cgi>) website databases (Bethesda, MD, USA). This *in silico* analysis was periodically updated with new entries currently available. Number of mismatches of the primers and probes of the GPS™ kit and the designs recently published was calculated to evaluate the *in silico* specificity (Table 1). An illustration of the mismatching of primers/probe sequences of the GPS™ CoVID-19 dtec-RT-qPCR Test, respect of the SARS-CoV-2, Bat SARS-like-CoV, SARS-CoV, Bat-CoV, and Pangolin-CoV groups is shown in Figure 2.

**2.3. GPS™ COVID-19 dtec-RT-qPCR Test**

Assays using the GPS™ COVID-19 dtec-RT-qPCR kit (Alicante, Spain) were prepared and reaction mixtures were subjected to qPCR in a QuantStudio3 (ABI) as described in the manual provided. Internal, positive, and negative PCR controls were included. Standard curve calibration of the qPCR was performed by preparing ten-fold dilution series containing 10 to 10<sup>6</sup> copies of standard template provide in the kit, but also using 5·10<sup>6</sup> to 5·10 copies of two complete synthetic RNA genomes from SARS-CoV-2 isolate Australia/VIC01/2020 (GenBank No.: MT007544.1) and isolate Wuhan-Hu-1, (GenBank No.: MN908947.3), provided by Twist Bioscience (South San Francisco, United States of America).

**2.4. ANALYTICAL AND DIAGNOSTIC VALIDATION OF THE GPS™ CoVID-19 dtec-RT-qPCR Test**

The method for SARS-CoV-2 detection using the GPS™ kit was subjected to strict validation according to guidelines of the UNE/EN ISO/IEC 17025:2005 and ISO/IEC 15189 [22, 23], as previously described in detail [22]. Validation terms included were repeated 10-15 times *and* the acceptance criteria are shown in Table 2. Diagnostic validation was a service performed by the Instituto de Salud Carlos III (ISCIII), reference laboratory for biomedical investigation and Public

156 Health (Madrid, Spain), by testing 80 breath specimens of the anonymous biobank of Centro  
157 Nacional de Microbiología (CNM, Madrid, Spain) previously characterized by a reference protocol  
158 [12]. The GPS™ kit was also evaluated by the Public Health England (PHE; Colindale, London,  
159 UK) with a sample-panel of 195 specimens, including respiratory clinical specimens negative for  
160 SARS-CoV-2 as determined by the validated in-house PHE PCR assay (RdRP gene) and three  
161 dilutions of SARS-CoV-2 positive material.

162

163

164

165

166

167

168

169

170

171

172

173

174

175

176

177

178

179

180

181

182

183

184

185

186

187

188

189

3. RESULTS

The phylogenetic relationships of selected SARS-CoV-2 genomes and other Betacoronavirus SARS-CoV, Bat SARS-like-CoV, Bat-CoV, and Pangolin-CoV are shown in Figure 1. The analysis indicated that Bat-CoV RaTG13 and a sequence of Pangolin-CoV showed the highest sequence similarity to SARS-CoV-2 (96.70% and 90.74%, respectively) while other Pangolin-CoV sequences available showed a lower homology (85.21%). For *in silico* specificity analysis, primers and probes sequences of the GPS™ kit and the other RT-qPCR designs recently published (16-27), were aligned to SARS-CoV-2 and the other Betacoronaviruses sequences and number of mismatches were annotated in Table 1. In order to illustrate the extent of mismatching of GPS™ kit, an alignment of primers/probe sequences to selected SARS-CoV sequences is shown in Figure 2. Analytical and diagnostic validation of the GPS™ kit, according to the guidelines of the UNE/EN ISO/IEC 17025:2005 and ISO/IEC 15189 [23, 24], was undertaken and the results were summarized in Table 2. Standard calibration curves of the qPCR were performed from ten-fold dilution series (Figure 3a, b) and synthetic RNA genomes of Australia/VIC01/2020 and Wuhan-Hu-1 SARS-CoV-2 isolates (Figure 3c, d). Finally, results of diagnostic validation achieved by the Instituto de Salud Carlos III (ISCIII) are shown in Table 3, and 100% of diagnostic sensitivity and specificity was assigned. Evaluated by the Public Health England (PHE; Colindale, London, UK) and yielded 100% correlation with reference RT-qPCR (not shown).

224       **4. DISCUSSION**

225       Only three months ago, an outbreak of severe pneumonia caused by the novel coronavirus SARS-  
226       CoV-2 started in Wuhan (China) and rapidly expanded to almost all areas worldwide. Due to the  
227       need of urgent detection tools, several laboratories developed RT-qPCR methods by designing  
228       primers and probes from the alignment of a single-first provided SARS-CoV-2 genome sequence  
229       to known SARS-CoV, and some of these protocols were published at the WHO website [12-19].  
230       As the number of genomes available rapidly expanded during last January, the GPS™ CoVID-19  
231       dtec-RT-qPCR Test was based on a more specific target for SARS-CoV-2 detection, being this  
232       company one of the pioneers marketing a PCR-kit for the CoVID-19 worldwide.

233  
234       The phylogenetic analysis indicated that, while SARS-CoV-2 shows a high sequence homology  
235       (over 99.91-99.97%), the closest relatives were strains of several Betacoronaviruses, with  
236       considerable sequence identity to Pangolin isolates, (Figure 1) which confirmed previous results  
237       [1, 6, 25-27, 29]. We have found that a single genome sequence of the Bat coronavirus RaTG13  
238       isolated from *Rhinolophus affinis* in Wuhan, showed the highest homology level (96.70%) to  
239       SARS-CoV-2, as previously described [1, 2, 4, 6, 29, 230]. However, because only a single Bat-  
240       CoV sequence showing this high identity is available, and it was deposited after the outbreak  
241       started (27<sup>th</sup> January), the possibility of RNA contamination during genome sequencing should be  
242       ruled-out before take further conclusions. During the design of the GPS™ kit, a purpose of present  
243       study was the comparison *in silico* (Table 1) with designed primers and probes so far published  
244       [12-19]. In overall, all qPCR designs were inclusive for SARS-CoV-2 as primers and probes  
245       showed a good matching. Only the probe for N gene designed by Chu et al., 2020 [17] showed 4  
246       mismatches which may affect to its binding, particularly considering its short primary structure. In  
247       some cases, single nucleotide mismatching was observed in some primers, but none of them were  
248       located close to primer 3'-end. Considering all updated alignments, only the Australia/VIC01/2020  
249       sequence showed a unique mismatch to the GPS™ probe. Therefore, a full calibration was run  
250       using synthetic RNA-genomes from Australia/VIC01/2020 isolate and the resulting Ct values  
251       correlated with this obtained from Wuhan-Hu-1 synthetic RNA-genome (Figure 3), indicating that  
252       mismatch in the probe is tolerated.

253  
254       The *in silico* analysis for exclusivity was more complex, showing a wide range of discriminative  
255       power for the methods subjected to analysis (Table 1). For instance, the two RT-qPCR designs  
256       IP2 and IP4 developed by Institut Pasteur seems to discriminate well between SARS-CoV-2 and  
257       other respiratory virus as confirmed for a panel of specimens [14]. The CDC from Atlanta (USA)



designed 3 different primer/probes sets named N1, N2 and N3 [15]. We found a low exclusivity in the N3 primer/probe, but a few weeks ago, this set was removed from the panel (<https://www.who.int/emergencies/diseases/novel-coronavirus-2019/technical-guidance/laboratory-guidance>). Both N1 and N2 showed a good level of mismatching with most coronaviruses except for some Pangolin-CoV sequences which showed very few nucleotide differences. The RT-qPCR proposed by Corman et al., 2020, designed to detect SARS-CoV-2, SARS-CoV and Bat SARS-like-CoV [12], is probably the most used worldwide. They suggested the use of E gene assay as the first-line screening tool, followed by confirmatory testing with the two probes P1 and P2 in the RdRp gene assay. While P1 probe should react with both SARS-CoV-2 and SARS-CoV, P2 probe was considered specific for SARS-CoV-2. Although our *in silico* results confirmed that purpose for P1 (Table 1), the RdRp\_P2 assay may also react with some other coronaviruses. The CDC in China developed two RT-qPCR assays for ORF1ab and N genes [16]. Both showed a good overall mismatching to consider they are exclusive, except for some Pangolin-CoV sequences. A similar conclusion may be taken for the N-gene RT-qPCR at the Ministry of Public Health of Thailand [18]. Data of Table 1 indicated that primer/probe of Chu et al., 2020 [17], may be reactive with SARS-CoV-2, SARS-CoV and Bat SARS-like-CoV. The exclusivity of the RT-qPCR design developed by Shirato et al., 2020 [19] clearly resided in the reverse primer as showed 7 mismatches with all SARS related coronaviruses. Finally, Chan et al., 2020 [13] developed three RT-qPCR assays targeting RdRp/Hel, S and N genes of SARS-CoV-2. They selected the RdRp/Hel assay as considered to give the best amplification performance and was tested in parallel with the RdRp-P2 from Charité-Berlin [12]. All positive patients with the RdRp-P2 assay were positive with the RdRp/Hel design. However, 42 patients negative for the RdRp-P2 assay were positive with RdRp/Hel and they found that only RdRp-P2 assay, but not RdRp/Hel, cross-reacted with SARS-CoV culture lysates [13]. Above findings agreed with expected exclusivity derived from the present study. Additional comparative *in vitro* analysis [31] have indicated that primer/probes of ORF1ab from the CDC-China [16] seems the most sensitive, the N2 and N3 assays from the CDC-Atlanta were the most recommended [31]. This partially disagrees our findings as the N3 design may react with other coronaviruses than SARS-CoV-2 (recently removed for the CDC panel). In the study by Arun et al., 2020 [32], the specificity of methods from Charité-Berlin and CDC-Atlanta were tested finding no false positive results but differences in the sensitivity. The most sensitive were N2 (CDC-Atlanta) and E (Charité-Berlin). However, the present study indicates the RT-qPCR for E target may react with different SARS coronavirus. Finally, the kit GPS™ COVID-19 dtec-RT-qPCR Test have shown the highest number of mismatches (i.e., 19-48) for all CoV sequences described so far, including these of

292 Pangolin-CoV which showed a range of 19-31 mismatches. In addition, considerable indels were  
293 discerned which enlarge even more the exclusivity of this design.

294

295 The GPS™ kit passed the analytical and diagnostic validation according to criteria of the UNE/EN  
296 ISO/IEC 17025:2005 and ISO/IEC 15189 (Table 2). The analysis standard curve was repeated a  
297 minimum of ten times and average value for all parameters were optimum according to standard  
298 limits. For reliability, the coefficient of variation (CV) obtained in all cases for both, repeatability  
299 and reproducibility, was always much lower than 10%. The LOD was tested with the usual protocol  
300 for 10 copies repeated 15 times with a positive result in all cases (100%). LOQ assays were  
301 performed in two sets of 15 tests for both 10 copies of standard templates. The LOQ measurement  
302 in both cases was validated with a t-Student test with a confidence interval of 95%. The kit received  
303 diagnostic validation at two different reference laboratories (ISCIII, Madrid; and PHE, London).  
304 The results shown in Table 3 indicated 100% of diagnostic sensitivity and 100% of diagnostic  
305 specificity was assigned. Currently, the kit is being used in several Spanish hospitals and  
306 diagnostic laboratories.

307

308 Obviously, at the time of designing the RT-qPCR published [12-19], a lack of SARS-CoV-2  
309 genomes available may explain the relatively scarce exclusivity found in some cases. Despite the  
310 greater or lesser *in silico* specificity of these primers and probes, due to host specificity of Bat-  
311 CoV, Bat SARS-like, Pangolin-CoV, together with the fact of that no human-SARS have been  
312 reported since 2004, all positive results obtained would be considered as SARS-CoV-2 infections  
313 [17, 33]. However, RNA viruses may exhibit substantial genetic variability. Although efforts were  
314 made to design RT-qPCR assays in conserved regions of the viral genomes, variability resulting  
315 in mismatches between the primers and probes and the target sequences can result in diminished  
316 assay performance and possible false negative results. Primers and probes should be reviewed  
317 and updated according to new data, which will increase exponentially during the next few  
318 weeks/months.

319

320

321

322

323

324

325     **ACKNOWLEDGEMENT AND FUNDING**

326     In memory of all the health professionals who have given their lives to care for their patients during  
327     this pandemic. We are most grateful to the scientists from the Instituto de Salud Carlos III, Madrid,  
328     Spain and the Public Health England, London, UK. This research received no specific grant from  
329     any funding agency in the public, commercial, or not-for-profit sectors.

330

331

332

333

334

335

336

337

338

339

340

341

342

343

344

345

346

347

348

349

350

351

352     **REFERENCES**

353     [1] Ceraolo C, Giorgi FM. Genomic variance of the 2019-nCoV coronavirus. J Med Virol  
354     2020;92:522-528.

355     [2] Jiang S, Shi ZL. The First Disease X is Caused by a Highly Transmissible Acute Respiratory  
356     Syndrome Coronavirus 2020. Virol Sin. <https://doi.org/10.1007/s12250-020-00206-5>.

357     [3] Lai CC, Shih TP, Ko WC, Tang HJ, Hsueh PR. Severe acute respiratory syndrome  
358     coronavirus 2 (SARS-CoV-2) and coronavirus disease-2019 (COVID-19): The epidemic and  
359     the challenges. Int J Antimicrob Agents 2020;55:105924-105933.

360     [4] Li X, Zai J, Zhao Q, Nie Q, Li Y, Foley BT, Chaillon A. Evolutionary history, potential  
361     intermediate animal host, and cross-species analyses of SARS-CoV-2. J Med Virol 2020.  
362     <https://doi.org/10.1002/jmv.25731>.

363     [5] Lu R, Zhao X, Li J, Niu P, Yang B, Wi H, Wang W, Song H, Huang B, Zhu N, Bi Y, Ma X,  
364     Zhan F, Wang L, Hu T, Zhou H, Hu Z, Zhou W, Zhao L, Chen J, Meng Y, Wang J, Lin Y, Yuan  
365     J, Xie Z, Ma J, Liu WJ, Wang D, Xu W, Holmes EC, Gao GF, Wu G, Chen W, Shi W, Tan W.  
366     Genomic characterisation and epidemiology of 2019 novel coronavirus: implications for virus  
367     origins and receptor binding. Lancet 2020;395:565-574.

368     [6] Zhou P, Yang XL, Wang XG, Hu B, Zhang L, Zhang W, Si HR, Zhu Y, Li B, Huang CL,  
369     Chen HD, Chen J, Luo Y, Guo H, Jiang RD, Liu MQ, Chen Y, Shen XR, Wang X, Zheng XS,  
370     Zhao K, Chen QJ, Deng F, Liu LL, Yan B, Zhan FX, Wang YY, Xiao GF, Shi ZL. A pneumonia  
371     outbreak associated with a new coronavirus of probable bat origin. Nat 2020;579:270-273.

372     [7] Mackay IM, Arden KE, Nitsche A. Real-time PCR in virology. Nucleic Acids Res  
373     2002;30:1292-1305.

374     [8] Drosten C, Günther S, Preiser W, van derWerf S, Brodt HR, Becker S, Rabenau H, Panning  
375     M, Kolesnikova L, Fouchier RAM, Berger A, Burguière AM, Cinatl J, Eickmann M, Escriou N,  
376     Grywna K, Kramme S, Manuguerra JC, Müller S, Rickerts V, Stürmer M, Vieth S, Klenk HD,  
377     Osterhaus ADME, Schmitz H, Doerr HW. Identification of a Novel Coronavirus in Patients with  
378     Severe Acute Respiratory Syndrome. N Engl J Med 2003;348:1947-1976.

379     [9] Poon LLM, Wong BWY, Chan KH, Leung CSW, Yuen KY, Guan Y, Peiris JSM. A one step  
380     quantitative RT-PCR for detection of SARS coronavirus with an internal control for PCR  
381     inhibitors. J Clin Virol 2004;3:214-217.

- [10] Corman VM, Eckerle I, Bleicker T, Zaki A, Landt O, Eschbach-Bludau M, van Boheemen S, Gopal R, Ballhause M, Bestebroer TM, Muth D, Müller MA, Drexler JF, Zambon M, Osterhaus AD, Fouchier RM, Drosten C.. Detection of a novel human coronavirus by real-time reverse-transcription polymerase chain reaction. *Euro surveill* 2012;39:pi=20285.
- [11] Corman VM, Müller MA, Costabel U, Timm J, Binger T, Meyer B, Kreher P, Lattwein E, Eschbach-bludau M, Nitsche A, Bleicker T, Landt O, Schweiger B, Drexler JF, Osterhaus AD, Haagmans BL, Dittmer U, Bonin F, Wolff T, Drosten C. Assays for laboratory confirmation of novel human coronavirus (hCoV-EMC) infections. *Euro surveill* 2012;49:pi=20334.
- [12] Corman VM, Landt O, Kaiser M, Molenkamp R, Meijer A, Chu DKW, Bleicker T, Brünink S, Schneider J, Schmidt ML, Mulders DGJC, Haagmans BL, van der Veer B, van den Brink S, Wijsman L, Godersky G, Romette JL, Ellis J, Zambon M, Peiris M, Goossens H, Reusken C, Koopmans MPG, Drosten C. Detection of 2019 novel coronavirus (2019-nCoV) by real-time RT-PCR. *Euro Surveill* 2020;25:pi=2000045.
- [13] Chan JF, Yip CC, To KK, Tang TH, Wong SC, Leung KH, Fung AY, Ng AC, Zou Z, Tsoi HW, Choi GK, Tam AR, Cheng VC, Chan KH, Tsang OT, Yuen KY.. Improved molecular diagnosis of COVID-19 by the novel, highly sensitive and specific COVID-19-RdRp/HeI real-time reverse transcription-polymerase chain reaction assay validated in vitro and with clinical specimens. *J Clin Microbiol* 2020;58:e00310-20.
- [14] Institut Pasteur, Paris. Protocol: Real-time RT-PCR assays for the detection of SARS-CoV-2. 2020. [https://www.who.int/docs/default-source/coronaviruse/real-time-rt-pcr-assays-for-the-detection-of-sars-cov-2-institut-pasteur-paris.pdf?sfvrsn=3662fcb6\\_2](https://www.who.int/docs/default-source/coronaviruse/real-time-rt-pcr-assays-for-the-detection-of-sars-cov-2-institut-pasteur-paris.pdf?sfvrsn=3662fcb6_2).
- [15] Centers for Disease Control and Prevention (CDC) Atlanta, USA. 2019-Novel Coronavirus (2019-nCoV) Real-time rRT-PCR Panel Primers and Probes. 2020. <https://www.cdc.gov/coronavirus/2019-ncov/lab/rt-pcr-panel-primer-probes.html>
- [16] National Institute for Viral Disease Control and Prevention (CDC), China. Specific primers and probes for detection 2019 novel coronavirus. 2020. [http://ivdc.chinacdc.cn/kyjz/202001/t20200121\\_211337.html](http://ivdc.chinacdc.cn/kyjz/202001/t20200121_211337.html)
- [17] Chu DKW, Pan Y, Cheng SMS, Hui KPY, Krishnan P, Liu Y, Ng DYM, Wan CKC, Yang P, Wang Q, Peiris M, Poon LLM. Molecular diagnosis of a Novel Coronavirus (2019-nCoV) Causing an Outbreak of Pneumonia. *Clin Chem* 2020;66:549-555.
- [18] Department of Medical Sciences, Ministry of Public Health, Thailand. RT-PCR protocol for the detection of 2019-nCoV. 2020. <https://www.who.int/docs/default->

- [source/coronaviruse/conventional-rt-pcr-followed-by-sequencing-for-detection-of-ncov-rirl-nat-inst-health-t.pdf?sfvrsn=42271c6d\\_4](https://www.nat-inst-health-t.pdf?sfvrsn=42271c6d_4).
- [19] Shirato K, Nao N, Katano H, Takayama I, Saito S, Kato F, Katoh H, Sakata M, Nakatsu Y, Mori Y, Kageyama T, Matsuyama S, Takeda M. Development of Genetic Diagnostic Methods for Novel Coronavirus 2019 (n-CoV-2019) in Japan. *Jpn J Infect Dis*. 2020. <https://doi.org/10.7883/yoken.JJID.2020.061>.
- [20] Saitou N, Nei M. The neighbor-joining method: a new method for reconstructing phylogenetic trees. *Molecular Biology and Evolution*. *Mol Biol Evol* 1987;4:406-425.
- [21] Tamura K, Peterson D, Peterson N, Stecher G, Nei M, Kumar S. MEGA5: Molecular Evolutionary Genetics Analysis Using Maximum Likelihood, Evolutionary Distance, and Maximum Parsimony Methods. *Mol Biol Evol* 2011;28:2731-2739.
- [22] Martínez-Murcia A, Navarro A, Bru G, Chowdhary A, Hagen F, Meis JF. *Mycoses* 2018;61:877-884.
- [23] UNE/EN ISO/IEC 17025:2005. Conformity assessment. General requirements for the competence of testing and calibration laboratories. <https://www.iso.org/standard/39883.html>.
- [24] UNE/EN ISO/IEC 15189:2012. Medical laboratories – Requirements for quality and competence. <https://www.iso.org/standard/56115.html>.
- [25] Paraskevis D, Kostaki E, Magiorkinis G, Panayiotakopoulos G, Sourvinos G, Tsiodras S. Full-genome evolutionary analysis of the novel corona virus (2019-nCoV) rejects the hypothesis of emergence as a result of a recent recombination event. *Infect Genet Evol* 2020;79:104212-104215.
- [26] Xu J, Zhao S, Teng T, Abdalla A, Zhu W, Xie L, Wang Y, Guo X. Systematic Comparison of Two Animal-to-Human Transmitted Human Coronaviruses: SARS-CoV-2 and SARS-CoV. *Viruses* 2020;12:244-260.
- [27] Zhang T, Wu Q, Zhang Z. Probable Pangolin Origin of SARS-CoV-2 Associated with the COVID-19 Outbreak. *Curr Biol* 2020;30:1346-1351.
- [28] Zheng J. SARS-CoV-2: an Emerging Coronavirus that Causes a Global Threat. *International Journal of Biological Sciences* 2020;16:1678-1685.
- [29] Lam T, Shum M, Zhu H, Tong Y, Ni X, Liao Y, Wei W, Cheung W, Li W, Li L, Leung G, Holmes E, Hu Y, Guan Y. Identifying SARS-CoV-2 related coronaviruses in Malayan pangolins. *Nature* 2020. <https://doi.org/10.1038/s41586-020-2169-0>.

[30] Li C, Yang Y, Ren L. Genetic evolution analysis of 2019 novel coronavirus and coronavirus from other species. *Infect Genet Evol* 2020;82:104285.

[31] Jung YJ, Park GS, Moon JH, Ku K, Beak SH, Kim S, Park EC, Park D, Lee JH, Byeon CW, Lee JJ, Maeng JS, Kim SJ, Kim SI, Kim BT, Lee MJ, Kim GH. Comparative analysis of primer-probe sets for the laboratory confirmation of SARS-CoV-2. *BioRxiv* 2020. <https://doi.org/10.1101/2020.02.25.964775>.

[32] Nalla AK, Casto AM, Huang MLW, Perchetti GA, Sampoleo R, Shrestha L, Wei Y, Zhu H, Jerome KR, Greninger AL. Comparative Performance of SARS-CoV-2 Detection Assays using Seven Different Primer/Probe Sets and One Assay Kit. *J Clin Microbiol* 2020. <https://doi.org/10.1128/JCM.00557-20>.

[33] National Institute of Allergy and Infectious Diseases, NIAID, United States of America. <https://www.niaid.nih.gov/diseases-conditions/covid-19>.

473 **FIGURE LEGENDS**

474 **Figure 1.** Phylogenetic neighbour-joining tree showing relationships of SARS-CoV-2 and the most  
475 related strains of some Betacoronavirus, including SARS-CoV, Bat-CoV, Bat SARS-like-CoV and  
476 Pangolin-CoV. The analysis was derived from the alignment of 18,141 nucleotides. Numbers at  
477 nodes indicate bootstrap values (percentage of 1000 replicates).

478

479 **Figure 2.** Illustrative alignment representation of the primers/probes sequences of GPS™ CoVID-  
480 19 dtec-RT-qPCR Test with a) SARS-CoV-2 (MN975262.1); b) Bat SARS-like-CoV  
481 (MG772934.1); c) SARS-CoV (AY304489.1); d) Bat-CoV (KY770859.1); and e) Pangolin-CoV  
482 (EPI\_ISL\_410539).

483

484 **Figure 3.** Quality Control of the GPS™ CoVID-19 dtec-RT-qPCR Test with data of six ranges of  
485 decimal dilution from 10<sup>6</sup> copies to 10 copies, and negative control. a) Amplification plot and b) a  
486 representative calibration curve with stats. Inclusivity of the GPS™ CoVID-19 dtec-RT-qPCR Test  
487 using six ranges of decimal dilution from 5·10<sup>6</sup> copies to 5·10 copies, and negative control.  
488 Amplification plot of synthetic RNA of c) Australian strain of SARS-CoV-2 (MT007544.1); and d)  
489 Wuhan-Hu-1 strain of SARS-CoV-2 (MN908947.3).



490 **Table 1.** Number of mismatches found in the primers/probes sets of the GPS™ COVID-19 dtec-RT-qPCR Test and recently published, from the comparative *in silico* analysis  
 491 with Bat-CoV, Bat SARS-like-CoV, SARS-CoV and Pangolin-CoV. Numbers in bold show the sum of the mismatches found in the primers/probes of the RT-qPCR designs.  
 492 Numbers in brackets show the mismatches found in forward primer (FP), probe (P) and reverse primer (RP) following this format: [FP / P / RP].

493

|           |                                                                                       |            | TOTAL MISMATCHES |               |                 |                        |                           |                      |                  |                   |                      |                      |
|-----------|---------------------------------------------------------------------------------------|------------|------------------|---------------|-----------------|------------------------|---------------------------|----------------------|------------------|-------------------|----------------------|----------------------|
| Reference | INSTITUTION                                                                           | TARGET     | SARS-CoV-2       |               | Bat coronavirus |                        | Bat SARS-like coronavirus |                      | SARS coronavirus |                   | Pangolin coronavirus |                      |
|           | Genetic PCR solutions™ (Spain)                                                        | -          | <b>0-1</b>       | [0 / 0-1 / 0] | <b>37-48</b>    | [8-11 / 17-23 / 12-14] | <b>26-37</b>              | [6-9 / 12-17 / 8-11] | <b>36-38</b>     | [7-8 / 19 / 9]    | <b>19-31</b>         | [5-9 / 4-11 / 10-11] |
| [14]      | Institut Pasteur (Paris)                                                              | RdRp (IP2) | <b>0</b>         | [0 / 0 / 0]   | <b>6-9</b>      | [1-2 / 2-3 / 3-4]      | <b>10-11</b>              | [4 / 2-3 / 4]        | <b>7-12</b>      | [1-4 / 3 / 3-5]   | <b>4-8</b>           | [0-4 / 2 / 2]        |
|           |                                                                                       | RdRp (IP4) | <b>0</b>         | [0 / 0 / 0]   | <b>12-13</b>    | [1 / 6 / 5-6]          | <b>12-17</b>              | [1-2 / 5-7 / 6-8]    | <b>14</b>        | [2 / 6 / 6]       | <b>4-11</b>          | [0-1 / 2-3 / 2-7]    |
| [15]      | Centers for Disease Control and Prevention (Atlanta)                                  | N (1)      | <b>0-1</b>       | [0-1 / 0 / 0] | <b>8-10</b>     | [3-4 / 2 / 3-4]        | <b>8-10</b>               | [3-4 / 2 / 3-4]      | <b>11</b>        | [7 / 2 / 2]       | <b>2-11</b>          | [1-7 / 0-1 / 1-3]    |
|           |                                                                                       | N (2)      | <b>0</b>         | [0 / 0 / 0]   | <b>6</b>        | [0 / 5 / 1]            | <b>6</b>                  | [0 / 5 / 1]          | <b>7</b>         | [0 / 5 / 2]       | <b>4</b>             | [1 / 3 / 0]          |
|           |                                                                                       | N (3)      | <b>0-1</b>       | [0 / 0-1 / 0] | <b>3-5</b>      | [1-2 / 1 / 1-2]        | <b>2-5</b>                | [1-3 / 1 / 0-1]      | <b>4</b>         | [1 / 1 / 2]       | <b>1-3</b>           | [0-1 / 1-2 / 0]      |
| [12]      | Charité (Berlin)                                                                      | RdRp_P1    | <b>3</b>         | [0 / 2 / 1]   | <b>2</b>        | [0 / 2 / 0]            | <b>2-3</b>                | [0-1 / 1 / 1]        | <b>1</b>         | [0 / 1 / 0]       | <b>2-3</b>           | [0-1 / 1 / 1]        |
|           |                                                                                       | RdRp_P2    | <b>1</b>         | [0 / 0 / 1]   | <b>4</b>        | [0 / 4 / 0]            | <b>3-5</b>                | [0-1 / 2-3 / 1]      | <b>2-3</b>       | [0 / 2-3 / 0]     | <b>2-5</b>           | [0-1 / 1-3 / 1]      |
|           |                                                                                       | E          | <b>0</b>         | [0 / 0 / 0]   | <b>0-3</b>      | [0-1 / 0-1 / 0-1]      | <b>0</b>                  | [0 / 0 / 0]          | <b>0-5</b>       | [0-3 / 0-1 / 0-1] | <b>0</b>             | [0 / 0 / 0]          |
| [16]      | National Institute for Viral Disease Control and Prevention (China)                   | ORF1ab     | <b>0</b>         | [0 / 0 / 0]   | <b>7-8</b>      | [2 / 1 / 4-5]          | <b>7-9</b>                | [1-2 / 1-2 / 5]      | <b>7-8</b>       | [2 / 1 / 4-5]     | <b>2-4</b>           | [0-1 / 0-1 / 2]      |
|           |                                                                                       | N          | <b>0</b>         | [0 / 0 / 0]   | <b>8-10</b>     | [2 / 4-5 / 2-3]        | <b>5-10</b>               | [0-3 / 3-4 / 2-3]    | <b>8</b>         | [2 / 4 / 2]       | <b>3-8</b>           | [1 / 1-4 / 1-3]      |
| [17]      | Hong Kong University Faculty of Medicine (Hong Kong)                                  | ORF1b      | <b>0</b>         | [0 / 0 / 0]   | <b>0-1</b>      | [0 / 0-1 / 0]          | <b>0-1</b>                | [0 / 0-1 / 0]        | <b>0-6</b>       | [0 / 0-2 / 0-4]   | <b>2</b>             | [1 / 0 / 1]          |
|           |                                                                                       | N          | <b>4</b>         | [0 / 4 / 0]   | <b>4</b>        | [0 / 4 / 0]            | <b>4</b>                  | [0 / 4 / 0]          | <b>5</b>         | [1 / 4 / 0]       | <b>4-5</b>           | [0-1 / 4 / 0]        |
| [18]      | Ministry of Public Health (Thailand)                                                  | N          | <b>0</b>         | [0 / 0 / 0]   | <b>6</b>        | [1 / 2 / 3]            | <b>6-7</b>                | [1-2 / 2 / 3]        | <b>6</b>         | [2 / 2 / 2]       | <b>2-6</b>           | [0-1 / 1-3 / 1-2]    |
| [19]      | National Institute of Infectious Diseases (Japan)                                     | N          | <b>1</b>         | [0 / 0 / 1]   | <b>9-12</b>     | [2-4 / 1 / 6-7]        | <b>10</b>                 | [2 / 1 / 7]          | <b>11</b>        | [3 / 1 / 7]       | <b>3-7</b>           | [2-4 / 0 / 1-3]      |
| [13]      | Hong Kong University State Key Laboratory of Emerging Infectious Diseases (Hong Kong) | RdRp/Hel   | <b>1</b>         | [0 / 0 / 1]   | <b>12-18</b>    | [1-2 / 8-12 / 3-4]     | <b>11-15</b>              | [2 / 8-9 / 1-4]      | <b>11</b>        | [1 / 10 / 0]      | <b>4-6</b>           | [1 / 2-3 / 1-2]      |
|           |                                                                                       | S          | <b>0</b>         | [0 / 0 / 0]   | <b>14-22</b>    | [6-8 / 6-9 / 2-5]      | <b>24-25</b>              | [8-9 / 9 / 7]        | <b>23</b>        | [8 / 7 / 8]       | <b>11-19</b>         | [3-7 / 4-8 / 4]      |
|           |                                                                                       | N          | <b>0-1</b>       | [0 / 0 / 0-1] | <b>10-13</b>    | [2-3 / 7 / 1-3]        | <b>10-11</b>              | [1-2 / 7 / 2]        | <b>11-12</b>     | [2-3 / 7 / 2]     | <b>2-7</b>           | [1 / 0-3 / 1-3]      |

494 **Table 2.** Summarized results of CoVID-19 dtec-RT-qPCR Test validation according with  
 495 the guidelines of the UNE/EN ISO/IEC 17025:2005 and ISO/IEC 15189:2012, and  
 496 acceptance criteria adopted.

| Term of validation                    | Obtained values                                                                                                                     |                                                            | Acceptance criteria                                           | Result              |
|---------------------------------------|-------------------------------------------------------------------------------------------------------------------------------------|------------------------------------------------------------|---------------------------------------------------------------|---------------------|
| <b>Specificity</b>                    | <b>Positive:</b> SARS-CoV-2 isolate Australia/VIC01/2020 (GenBank No.: MT007544.1) and isolate Wuhan-Hu-1 (GenBank No.: MN908947.3) |                                                            | <b>Inclusiveness:</b><br>Positive for both SARS-CoV-2 strains | <b>ACCEPTED</b>     |
|                                       | <b>Negative:</b> 39 negative specimens from ISCH, previously characterized by reference protocol [12]                               |                                                            | <b>Exclusiveness:</b><br>Negative for all negative specimens, | <b>ACCEPTED</b>     |
| <b>Standard curve</b>                 | $Y = -3.534 \cdot m + 37.534$<br>$a = -3.534$<br>$R^2 = 0.9986$                                                                     |                                                            | $-3.587 < a < -3.103$                                         | <b>ACCEPTED</b>     |
|                                       | $F_{\text{assay}} = 0.014$<br>$F_{\text{fisher}} = 5.318$                                                                           |                                                            | $F_{\text{assay}} < F_{\text{fisher}}$                        | <b>ACCEPTED</b>     |
|                                       | Efficiency (e) = 93.1 %                                                                                                             |                                                            | $90 \% < e < 110\%$                                           | <b>VALIDATED</b>    |
| <b>Reliability</b>                    | <b>Repeatability</b>                                                                                                                |                                                            | $CV < 10\%$                                                   | <b>REPEATABLE</b>   |
|                                       | Conc.                                                                                                                               | CV (%)                                                     |                                                               |                     |
|                                       | 10 <sup>6</sup> copies                                                                                                              | 1.18                                                       |                                                               |                     |
|                                       | 10 <sup>5</sup> copies                                                                                                              | 1.08                                                       |                                                               |                     |
|                                       | 10 <sup>4</sup> copies                                                                                                              | 0.68                                                       |                                                               |                     |
|                                       | 10 <sup>3</sup> copies                                                                                                              | 0.53                                                       |                                                               |                     |
|                                       | 10 <sup>2</sup> copies                                                                                                              | 0.54                                                       |                                                               |                     |
|                                       | 10 copies                                                                                                                           | 1.31                                                       |                                                               |                     |
|                                       | <b>Reproducibility</b>                                                                                                              |                                                            | $CV < 10\%$                                                   | <b>REPRODUCIBLE</b> |
|                                       | Conc.                                                                                                                               | CV (%)                                                     |                                                               |                     |
|                                       | 10 <sup>6</sup> copies                                                                                                              | 1.13                                                       |                                                               |                     |
|                                       | 10 <sup>5</sup> copies                                                                                                              | 0.91                                                       |                                                               |                     |
|                                       | 10 <sup>4</sup> copies                                                                                                              | 0.93                                                       |                                                               |                     |
|                                       | 10 <sup>3</sup> copies                                                                                                              | 0.59                                                       |                                                               |                     |
|                                       | 10 <sup>2</sup> copies                                                                                                              | 0.66                                                       |                                                               |                     |
|                                       | 10 copies                                                                                                                           | 1.83                                                       |                                                               |                     |
| <b>Limit of Detection (LOD)*</b>      | 10 copies                                                                                                                           | Positive = 15/15 (100%)                                    | Positives $\geq 90 \%$                                        | <b>ACCEPTED</b>     |
| <b>Limit of Quantification (LOQ)*</b> | 10 copies                                                                                                                           | $t_{\text{value}} = 0.582$<br>$t_{\text{student}} = 2.145$ | $t_{\text{value}} < t_{\text{student}}$                       | <b>ACCEPTED</b>     |
| <b>Diagnostic Validation</b>          | Diagnostic Specificity: 100%<br>Diagnostic Sensitivity: 100%<br>Diagnostic Efficiency: 100%                                         |                                                            | $\geq 90 \%$                                                  | <b>ACCEPTED</b>     |

497

498

499

**Table 3.** Results obtained with GPS™ CoVID-19 dtec-RT-qPCR Test in 80 breath specimens compared with the Ct values determined by using a reference protocol [12], at the Instituto de Salud Carlos III (Madrid)

| <b>CNM Code</b> | <b>CNM Result</b> | <b>CNM Ct GEN1</b> | <b>CNM Ct GEN2</b> | <b>CoVID-19 dtec-RT-qPCRT Test</b> | <b>Ct CoVID-19 dtec-RT-qPCR Test</b> |
|-----------------|-------------------|--------------------|--------------------|------------------------------------|--------------------------------------|
| #01             | NEG               | 0                  | 0                  | NEG                                | 0                                    |
| #02             | NEG               | 0                  | 0                  | NEG                                | 0                                    |
| #03             | POS               | 24                 | 28                 | POS                                | 29.43                                |
| #04             | POS               | 24                 | 28                 | POS                                | 23.06                                |
| #05             | POS               | 23.19              | 26.10              | POS                                | 27.56                                |
| #06             | NEG               | 0                  | 0                  | NEG                                | 0                                    |
| #07             | NEG               | 0                  | 0                  | NEG                                | 0                                    |
| #08             | POS               | 27.16              | 30.41              | POS                                | 32.18                                |
| #09             | NEG               | 0                  | 0                  | NEG                                | 0                                    |
| #10             | POS               | 20.19              | 25.17              | POS                                | 21.42                                |
| #11             | POS               | 28                 | 32                 | POS                                | 30.63                                |
| #12             | NEG               | 0                  | 0                  | NEG                                | 0                                    |
| #13             | POS               | 28                 | 31                 | POS                                | 30.06                                |
| #14             | NEG               | 0                  | 0                  | NEG                                | 0                                    |
| #15             | POS               | 23.19              | 26.1               | POS                                | 24.72                                |
| #16             | NEG               | 0                  | 0                  | NEG                                | 0                                    |
| #17             | POS               | 27.48              | 31.16              | POS                                | 19.15                                |
| #18             | NEG               | 0                  | 0                  | NEG                                | 0                                    |
| #19             | NEG               | 0                  | 0                  | NEG                                | 0                                    |
| #20             | POS               | 23                 | 25                 | POS                                | 16.07                                |
| #21             | POS               | 23                 | 25                 | POS                                | 19.32                                |
| #22             | NEG               | 0                  | 0                  | NEG                                | 0                                    |
| #23             | NEG               | 0                  | 0                  | NEG                                | 0                                    |
| #24             | POS               | 25                 | 29                 | POS                                | 24.37                                |
| #25             | POS               | 20                 | 22                 | POS                                | 26.47                                |
| #26             | NEG               | 0                  | 0                  | NEG                                | 0                                    |
| #27             | POS               | 23                 | 25                 | POS                                | 24.86                                |
| #28             | NEG               | 0                  | 0                  | NEG                                | 0                                    |
| #29             | NEG               | 0                  | 0                  | NEG                                | 0                                    |
| #30             | POS               | 24                 | 27                 | POS                                | 23.45                                |
| #31             | NEG               | 0                  | 0                  | NEG                                | 0                                    |
| #32             | POS               | 24.29              | 27.08              | POS                                | 16.2                                 |
| #33             | NEG               | 0                  | 0                  | NEG                                | 0                                    |
| #34             | NEG               | 0                  | 0                  | NEG                                | 0                                    |
| #35             | POS               | 27.16              | 30.41              | POS                                | 29.22                                |
| #36             | NEG               | 0                  | 0                  | NEG                                | 0                                    |
| #37             | NEG               | 0                  | 0                  | NEG                                | 0                                    |
| #38             | POS               | 31                 | 34                 | POS                                | 33.41                                |
| #39             | NEG               | 0                  | 0                  | NEG                                | 0                                    |
| #40             | POS               | 23.13              | 26.49              | POS                                | 25                                   |
| #41             | POS               | 16.61              | 19.06              | POS                                | 16.58                                |
| #42             | NEG               | 0                  | 0                  | NEG                                | 0                                    |
| #43             | POS               | 22.14              | 25.35              | POS                                | 24.01                                |
| #44             | POS               | 26.47              | 29.47              | POS                                | 27.17                                |
| #45             | NEG               | 0                  | 0                  | NEG                                | 0                                    |
| #46             | POS               | 25.59              | 28.03              | POS                                | 27.23                                |
| #47             | POS               | 24.16              | 26.44              | POS                                | 25.96                                |
| #48             | NEG               | 0                  | 0                  | NEG                                | 0                                    |

|     |     |       |       |     |       |
|-----|-----|-------|-------|-----|-------|
| #49 | POS | 24.27 | 26.48 | POS | 25.99 |
| #50 | NEG | 0     | 0     | NEG | 0     |
| #51 | NEG | 0     | 0     | NEG | 0     |
| #52 | NEG | 0     | 0     | NEG | 0     |
| #53 | POS | 24.40 | 26.61 | POS | 26.37 |
| #54 | NEG | 0     | 0     | NEG | 0     |
| #55 | POS | 25.33 | 26.75 | POS | 25.66 |
| #56 | NEG | 0     | 0     | NEG | 0     |
| #57 | NEG | 0     | 0     | NEG | 0     |
| #58 | POS | 25.69 | 28.39 | POS | 27.08 |
| #59 | NEG | 0     | 0     | NEG | 0     |
| #60 | NEG | 0     | 0     | NEG | 0     |
| #61 | POS | 25.73 | 28.61 | POS | 27.24 |
| #62 | POS | 25.91 | 28.43 | POS | 27.46 |
| #63 | NEG | 0     | 0     | NEG | 0     |
| #64 | POS | 26.11 | 28.2  | POS | 27.98 |
| #65 | POS | 25.29 | 28.17 | POS | 27.84 |
| #66 | NEG | 0     | 0     | NEG | 0     |
| #67 | POS | 24.24 | 27.33 | POS | 26.19 |
| #68 | NEG | 0     | 0     | NEG | 0     |
| #69 | NEG | 0     | 0     | NEG | 0     |
| #70 | POS | 24.25 | 26.87 | POS | 26.81 |
| #71 | POS | 26.5  | 29.08 | POS | 26.35 |
| #72 | POS | 25.29 | 28.17 | POS | 26.91 |
| #73 | POS | 26.11 | 28.20 | POS | 26.45 |
| #74 | NEG | 0     | 0     | NEG | 0     |
| #75 | POS | 24.24 | 27.33 | POS | 26.41 |
| #76 | POS | 24.19 | 26.67 | POS | 26.65 |
| #77 | NEG | 0     | 0     | NEG | 0     |
| #78 | POS | 25.23 | 30.18 | POS | 31.72 |
| #79 | NEG | 0     | 0     | NEG | 0     |
| #80 | POS | 24.03 | 26.88 | POS | 26.43 |

503

504

505

506

507

508

509

510

511

512

**Figure 1.**

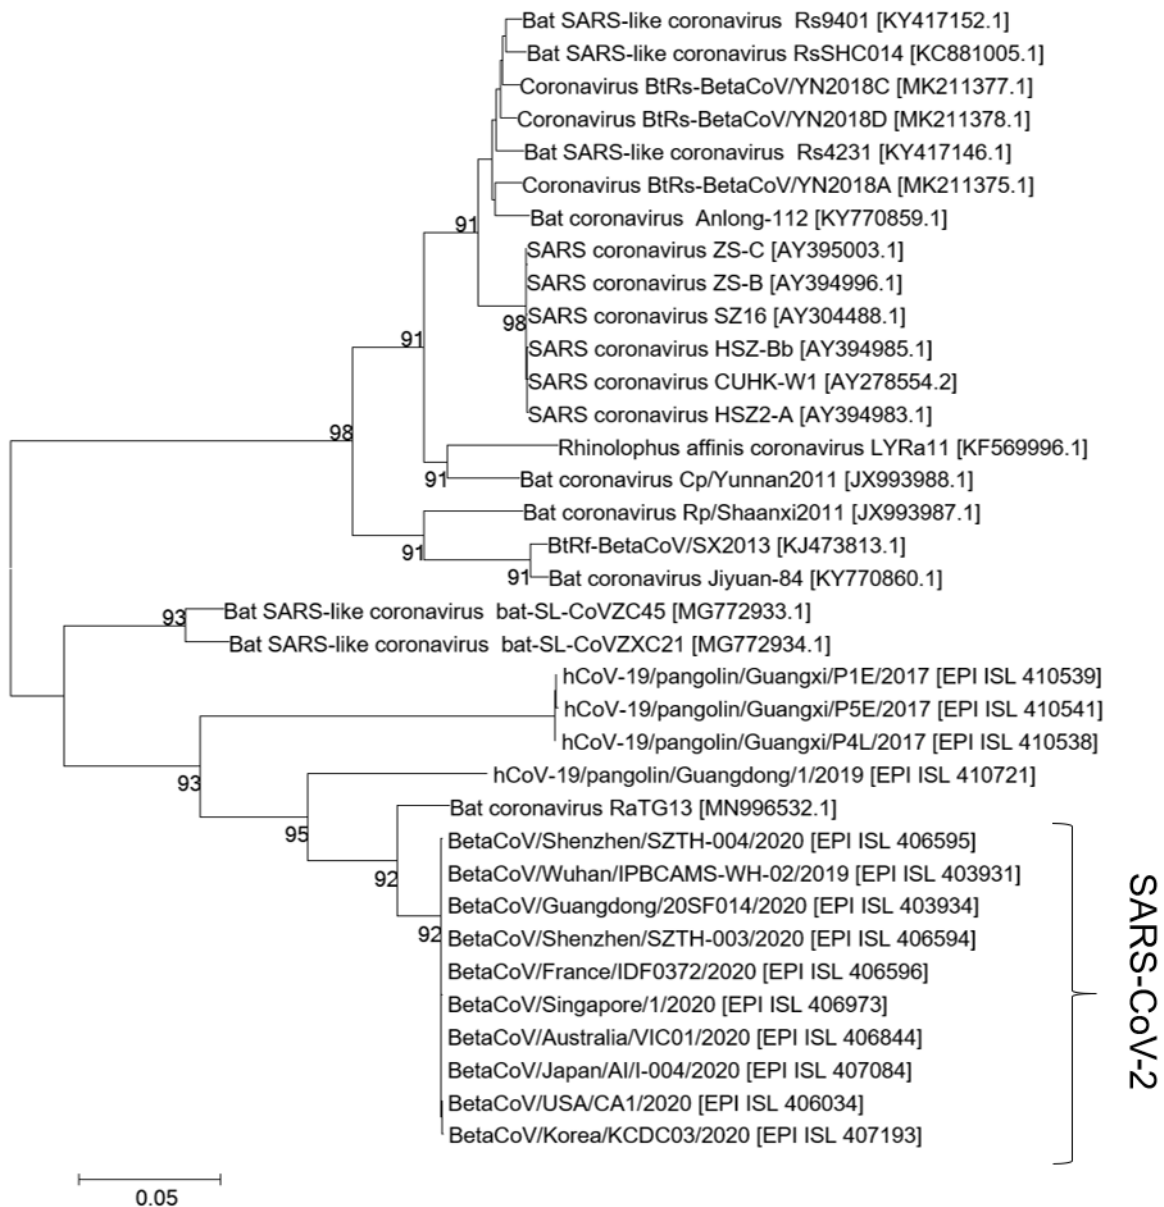

**Figure 2.**

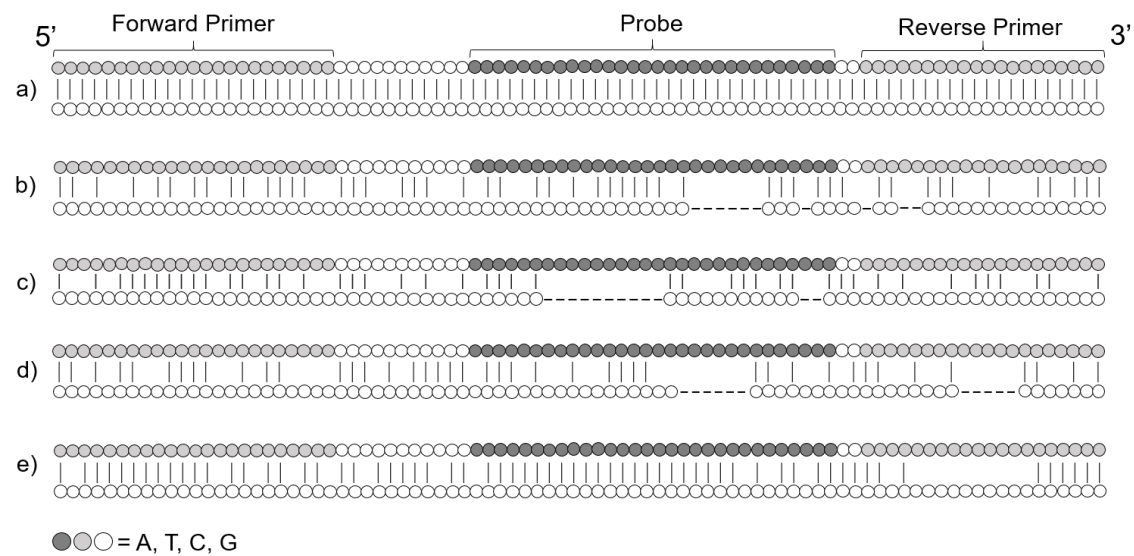

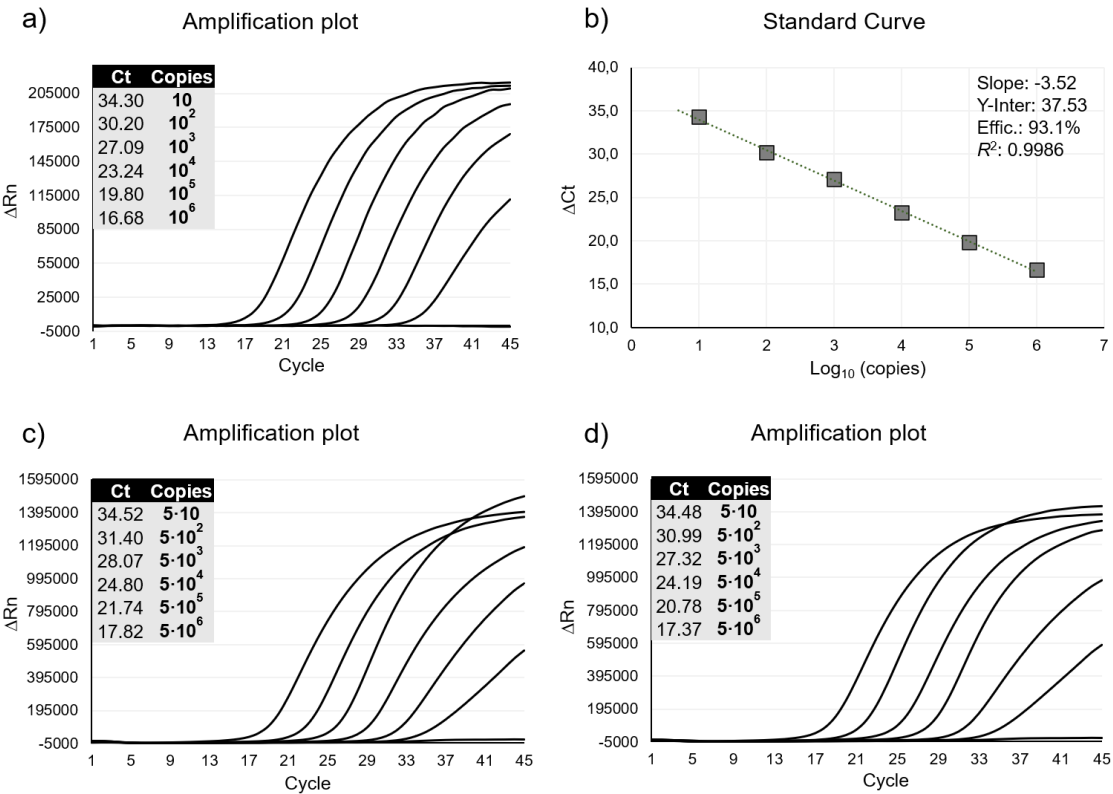

544

545

546
